# Supplementary material for: Transition of Inflammatory Bowel Disease Patients from Pediatric to Adult Care: An Observational Study on a Joint-Visits Approach
Source: Research Square preprint supplement (doi:10.21203/rs.3.rs-99432/v1), 2020-11-09
Supplement: Supplementary file 1 [file e599ca38dc561efb43809b98.xlsx]

## Sheet: Foglio1
	Questions	Answers' Mean Value (out of 5)
	1. Do you know what to do if you are having a bad reaction to your medications?	2.49057
	2. Do you take medications correctly and on your own?	4.0566
	3. Fai in modo di procurarti altre medicine prima che finiscano quelle che hai già?	4.58491
	4. Do you reorder medications before they run out?	3.24528
	5. Do you follow-up on any referral for tests, check-ups or labs?	3.96226
	6. Do you arrange for your ride to medical appointments?	2.15094
	7. Do you call the doctor about unusual changes in your health (For example: Allergic reactions)?	3.86792
	8. Do you know what your health insurance covers?	3.30189
	9. Do you manage your money & budget household expenses (For example: use checking/debit card)?	2.71698
	10. Do you fill out the medical history form, including a list of your allergies?	4.49057
	11. Do you keep a calendar or list of medical and other appointments?	1.81132
	12. Do you make a list of questions before the doctor’s visit?	1.92453
	13. Do you tell the doctor or nurse what you are feeling?	4.11321
	14. Do you answer questions that are asked by the doctor, nurse, or clinic staff?	4.75472
	15. Do you help plan or prepare meals/food?	3.26415
	16. Do you keep home/room clean or clean-up after meals?	3.13208
	Total	3.36675
	Legend: 1 - No, I do not know how. 2 - No, but I want to learn. 3 - No, but I am learning to do this. 4 - Yes, I have started doing this. 5 - Yes, I always dothis when I need to.
